# Supplementary figures and images for: The Driverless Triple-Wild-Type (BRAF, RAS, KIT) Cutaneous Melanoma: Whole Genome Sequencing Discoveries
Source: MDPI journal article supplement (doi:10.3390/cancers15061712), 2023-03-10

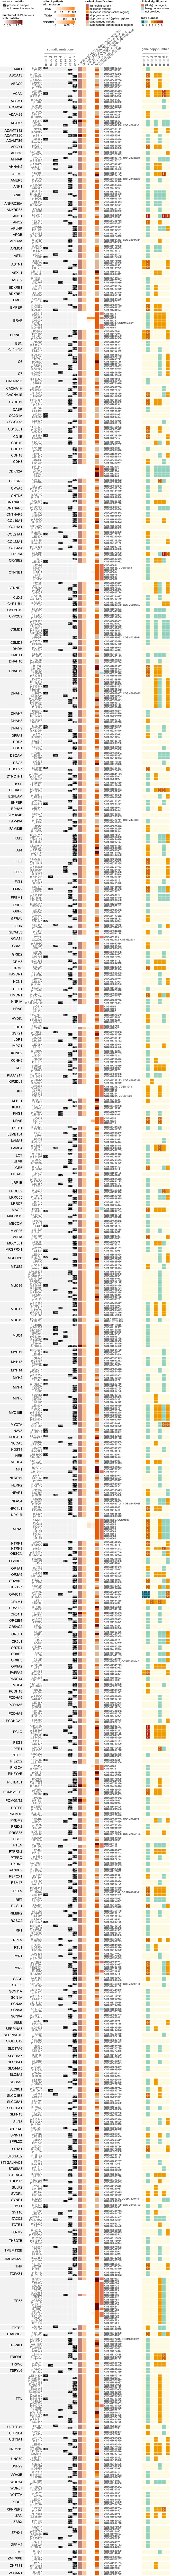

Supplement: s1 [file s1]
